# Supplementary material for: Packaging and containerization of computational methods
Source: Springer Nature journal article supplement (doi:10.1038/s41596-024-00986-0), 2024-04-02
Supplement: MOESM1 [file 41596_2024_986_MOESM1_ESM7.pdf]

# Packaging and containerization of computational methods

---

In the format provided by the authors and unedited

## Supplemental Materials

### Tables 1, 2, and 3 Methods:

**Release Dates:** Initial release dates for each of the package managers. This information was found on the websites of each package manager, or was recorded as the year that the first version was released if no official year was noted.

**Number of packages, container images, and virtual machine images:** This information was obtained from the websites of the respective platforms. If the desired number is explicitly mentioned in each website, we go through each website, download its respective HTML body that contains the page data with the list of tools. From here, using a text editor, the list of the packages for each package manager is extracted and then the length of that list is used to get the number of packages.
